# Supplementary material for: Tumor cell death after electrotransfer of plasmid DNA is associated with cytosolic DNA sensor upregulation
Source: PubMed Central journal article supplement (PMC5922346; doi:10.18632/oncotarget.24816), 2018-04-10
Supplement: oncotarget-09-18665-s001.pdf [file oncotarget-09-18665-s001.pdf]

## Tumor cell death after electrotransfer of plasmid DNA is associated with cytosolic DNA sensor upregulation

### SUPPLEMENTARY MATERIALS

Giemsa staining 6h after GET of gWiz-Blank into TS/A cell line

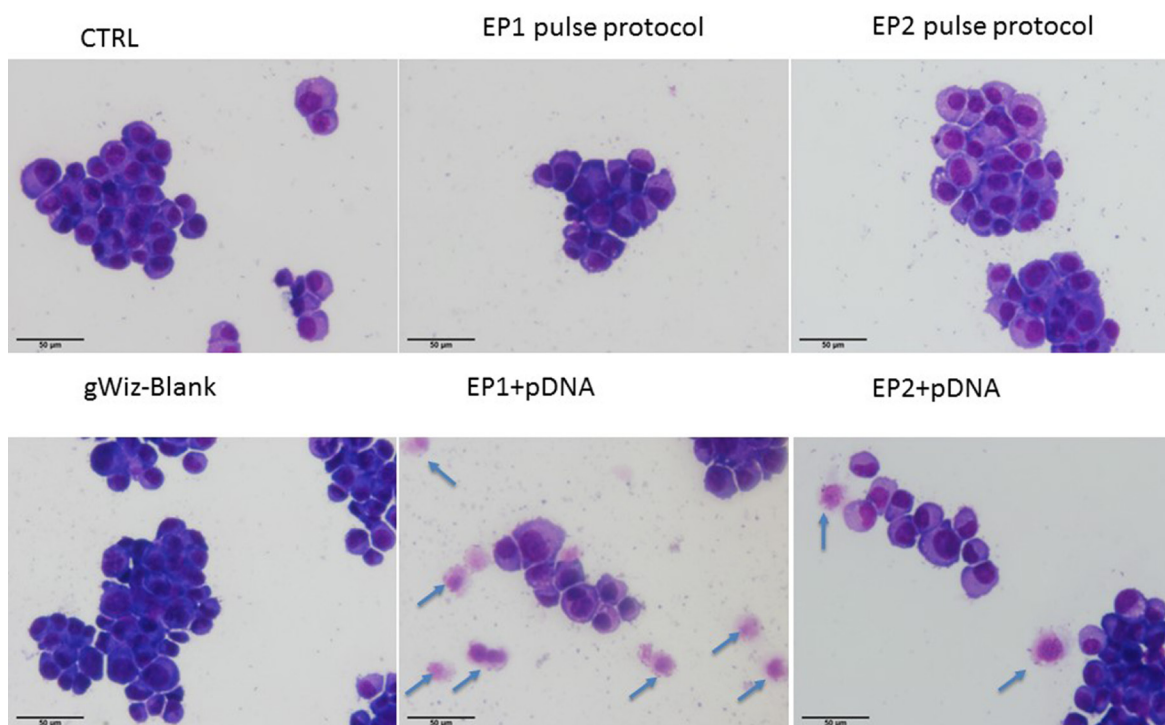

**Supplementary Figure 1: Morphology of TS/A cell line 6 hours after pDNA electrotransfer.** Blue arrows indicate necrotic cells displaying cytoplasmic fragmentation and only an outline of the nucleus.

Giemsa staining 6h after GET of gWiz-Blank into WEHI 164 cell line

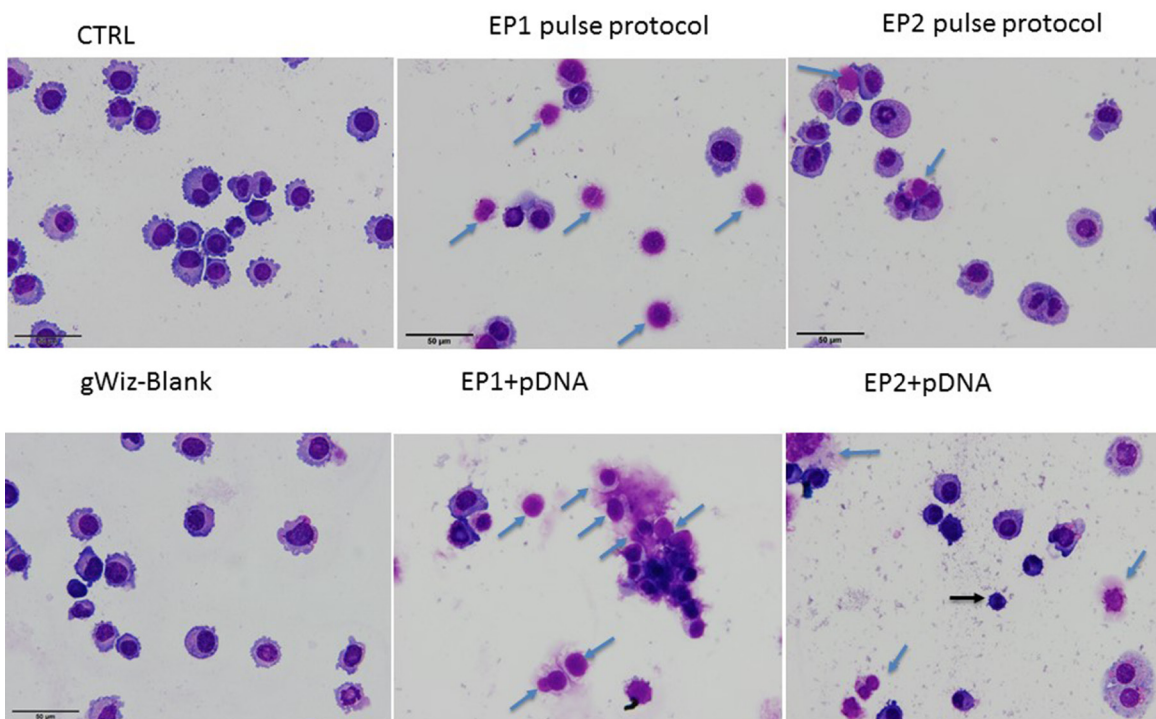

**Supplementary Figure 2: Morphology of WEHI 164 cell line 6 hours after pDNA electrotransfer.** Blue arrows indicate necrotic cells displaying cytoplasmic fragmentation and only an outline of the nucleus. Black arrows indicate apoptotic cells with vacuolization of the cytoplasm and formation of apoptotic bodies.

**Supplementary Table 1: RT-PCR Information.** See Supplementary\_Table\_1

**Supplementary Table 2: Raw data for ATP leakage assay for TS/A and WEHI 164 cells**

|      | control             |          | gWiz Blank          |          | EPI                 |          | EP2                 |          | pDNA+EPI            |          | pDNA+EP2            |          |
|------|---------------------|----------|---------------------|----------|---------------------|----------|---------------------|----------|---------------------|----------|---------------------|----------|
|      | a.u.<br>(mean ± SE) | <i>n</i> | a.u.<br>(mean ± SE) | <i>n</i> | a.u.<br>(mean ± SE) | <i>n</i> | a.u.<br>(mean ± SE) | <i>n</i> | a.u.<br>(mean ± SE) | <i>n</i> | a.u.<br>(mean ± SE) | <i>n</i> |
| TS/A | 4833.3 ± 98.0       | 6        | 3325.9 ± 420.4      | 6        | 679.4 ± 23.6        | 9        | 1178.1 ± 304.5      | 6        | 154.4 ± 28.7        | 9        | 976.0 ± 90.4        | 6        |
| WEHI |                     |          |                     |          |                     |          |                     |          |                     |          |                     |          |
| 164  | 1404.3 ± 497.4      | 5        | 1276.2 ± 413.6      | 5        | 310.0 ± 61.3        | 5        | 713.2 ± 221.6       | 5        | 106.0 ± 20.7        | 4        | 456.0 ± 128.7       | 7        |

a.u. - arbitrary units; SE – standard error of the mean.

## REFERENCES

1. Livak KJ, Schmittgen TD. Analysis of relative gene expression data using real-time quantitative PCR and the 2(-Delta Delta C(T)) Method. *Methods*. 2001; 25:402–8.
